# Supplementary material for: Plant metabolism of nematode pheromones mediates plant-nematode interactions
Source: PubMed Central journal article supplement (PMC6954178; doi:10.1038/s41467-019-14104-2), 2020-01-10
Supplement: 41467_2019_14104_MOESM1_ESM.pdf [file 41467_2019_14104_MOESM1_ESM.pdf]

1 **Supplementary Figures and Figure Legends**

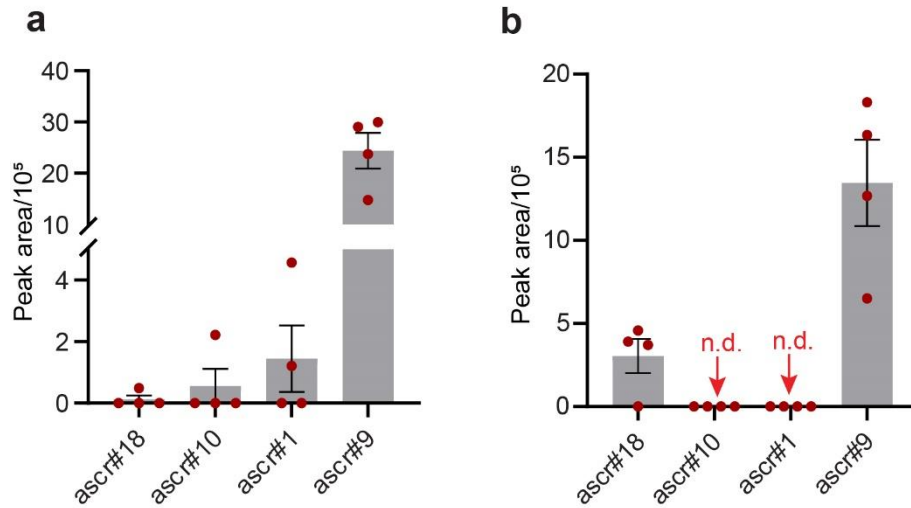

2

3 **Supplementary Figure 1 | Accumulation and metabolism of ascr#18 in plants. (a-b)**

4 Accumulation of ascarosides in tomato (a) and wheat (b) roots treated with 10 and 50 nM  
5 ascr#18 for 24 h, respectively. Abundances of ascarosides are shown as the peak area, as  
6 measured in LC-MS. Data are averages  $\pm$  SEM (n = 4). (n.d. = not detected). Source data are  
7 provided as a source data file.

8

9

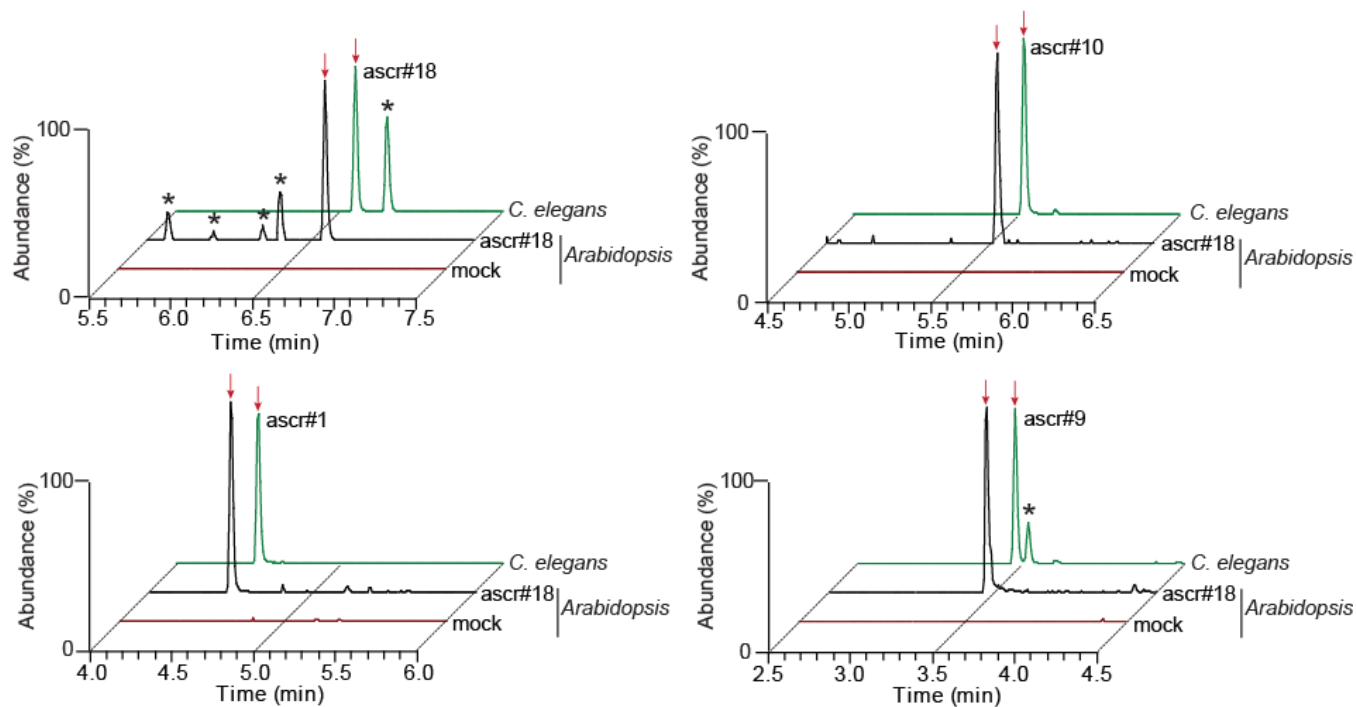

10

11 **Supplementary Figure 2 | Confirmation of ascarosides identity in plants.** LC-MS analysis of  
 12 exudates from tomato roots mock treated or treated with 1  $\mu$ M ascr#18 for 24 h and from  
 13 *Caenorhabditis elegans*, showing extracted ion chromatograms [EIC] in ESI of ascr#18,  
 14 ascr#10, ascr#1, and ascr#9. Peaks marked with an asterisk represent unrelated metabolites of  
 15 similar m/z.

16

17

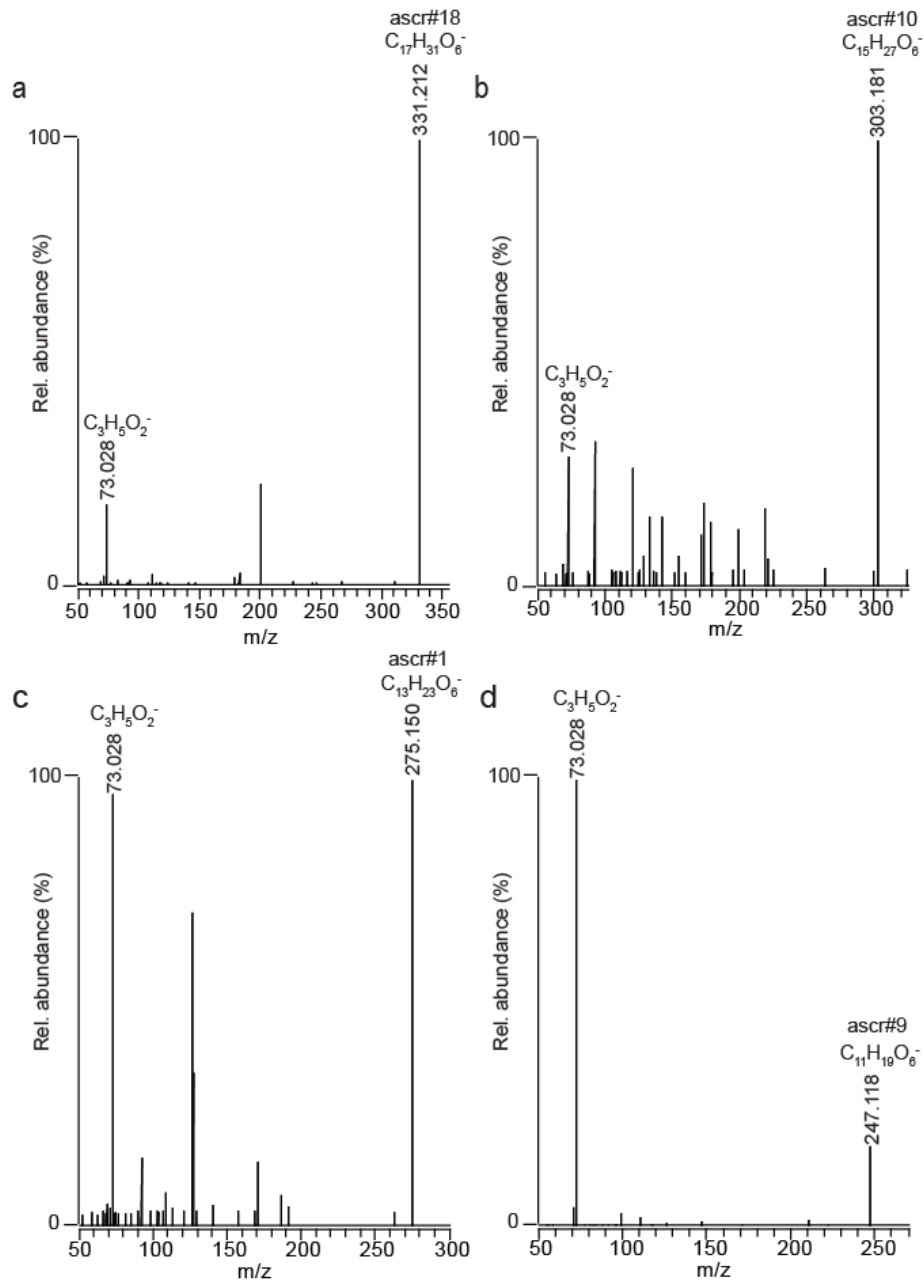

18

19 **Supplementary Figure 3 | LC-MS/MS analyses of *Arabidopsis* roots.** LC-MS/MS spectra of  
 20 ascr#18 (a), ascr#10 (b), ascr#1 (c), and ascr#9 (d) in ESI<sup>-</sup> showing presence of diagnostic  
 21 product ion at  $m/z = 73.028$  [ $C_3H_5O_2$ ]<sup>-</sup>, which originates from the ascarylose unit of ascarosides.  
 22 The method has been previously used for the detection of ascarosides in *C. elegans*<sup>1</sup>.

23

24

25

26

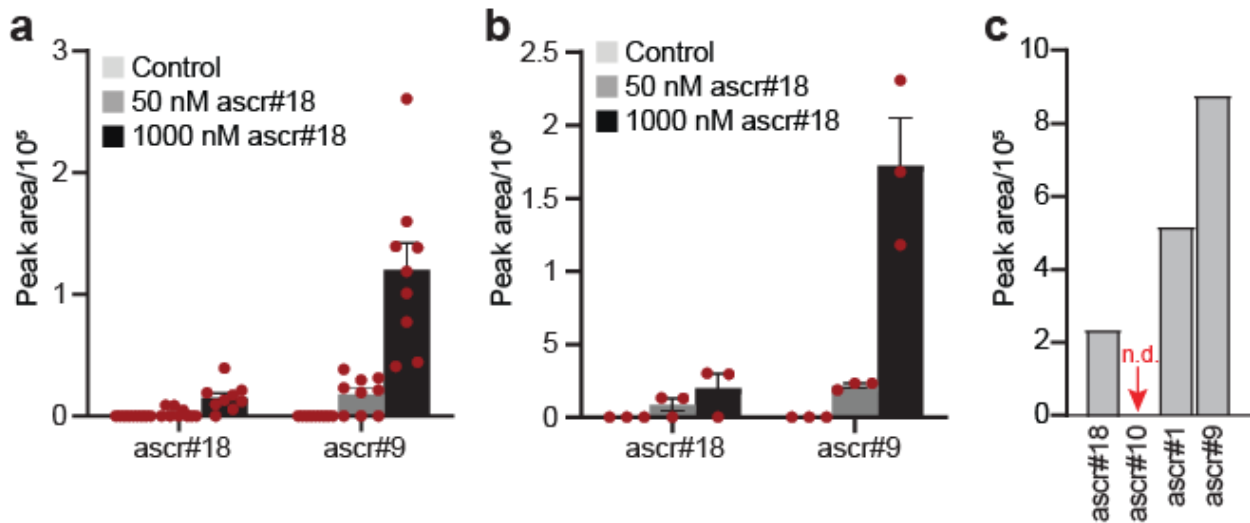

27

28

29 **Supplementary Figure 4 | Metabolism of naturally acquired ascr#18 by plants. (a-b)** LC-

30 MS analysis of *Arabidopsis* (a) and tomato (b) roots from plants grown in soil and treated with

31 50 nM and 1  $\mu$ M ascr#18 or treated with mock solution for 48 h. Abundances of ascarosides are

32 shown as the peak area, as measured in LC-MS. Data are mean  $\pm$  SEM (n = 9 for *Arabidopsis*

33 and n=3 for tomato). (c) LC-MS analysis of exudate of tomato plant roots naturally infested with

34 plant parasitic nematodes (*M. incognita*). Abundances of ascarosides are shown as peak area, as

35 measured in LC-MS.

36

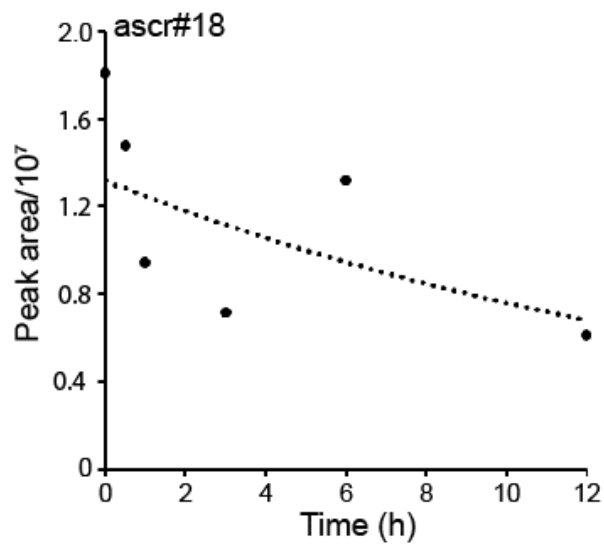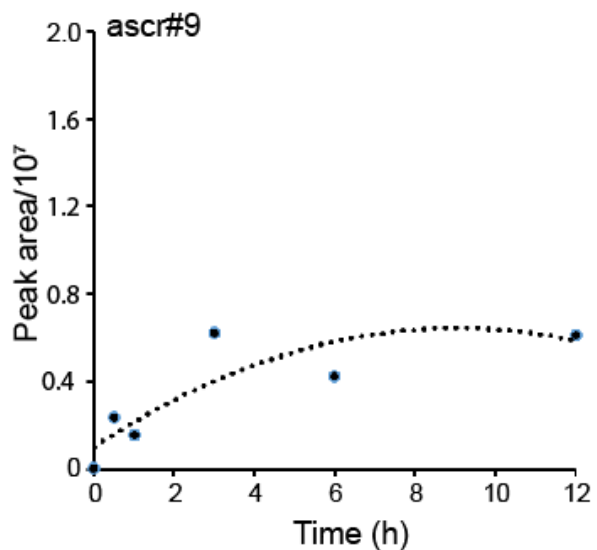

37

38 **Supplementary Figure 5 | LC-MS analyses of tomato leaves.** LC-MS analysis of tissue of  
 39 tomato leaves infiltrated with 1  $\mu$ M ascr#18; tissue was collected over a 12 h period.  
 40 Abundances of ascr#18 and ascr#9 are shown as the peak area, as measured in LC-MS. Source  
 41 data are provided as a source data file.

42

43

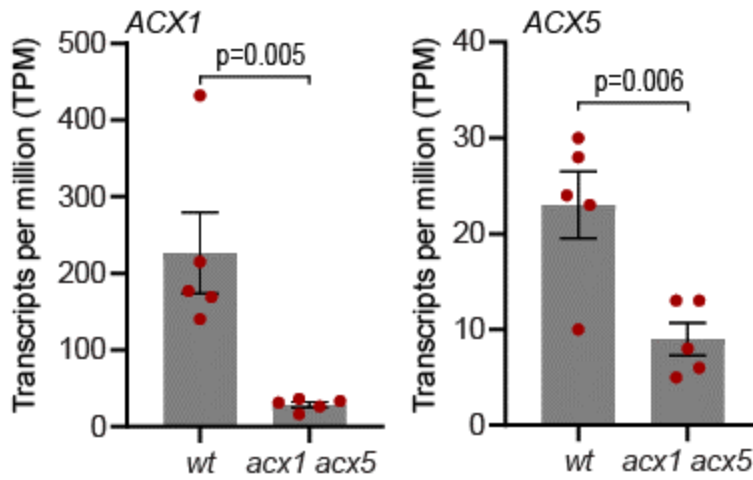

44

45 **Supplementary Figure 6 | Transcript level of ACX1 and ACX5.** RNAseq analysis of ten day-  
 46 old *Arabidopsis* wildtype and *acx1 acx5* roots. TNA-Seq counts was normalized and plotted as  
 47 Transcripts per million (TPM). Data are mean  $\pm$  SEM (n = 5). two-tailed *t*-test. Source data are  
 48 provided as a source data file.

49

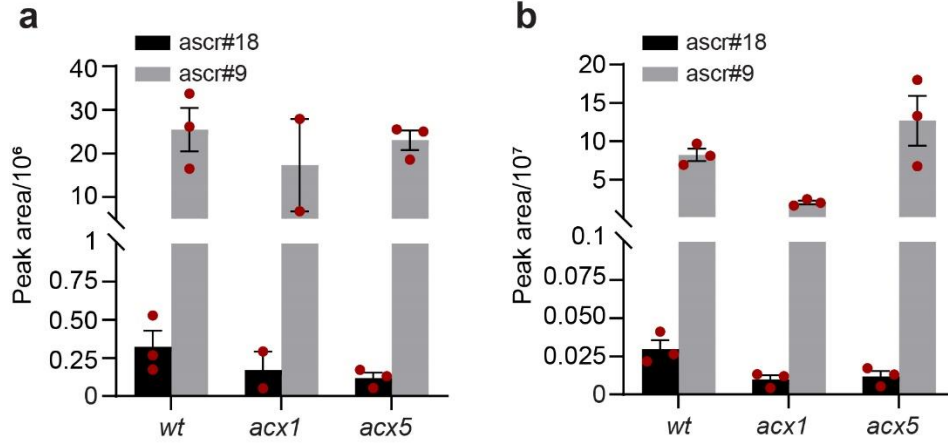

50

51 **Supplementary Figure 7 | The abundance of ascarosides in *wt*, *acx1*, and *acx5* *Arabidopsis***  
 52 **plants. (a-b) LC-MS analysis of *wt*, *acx1*, and *acx5* *Arabidopsis* roots treated with 250 nM (a)**  
 53 **and 1 μM (b) of ascr#18 for 24 h. Abundances of ascarosides are shown as the peak area, as**  
 54 **measured in LC-MS. Data are mean ± SEM (n = 3)**

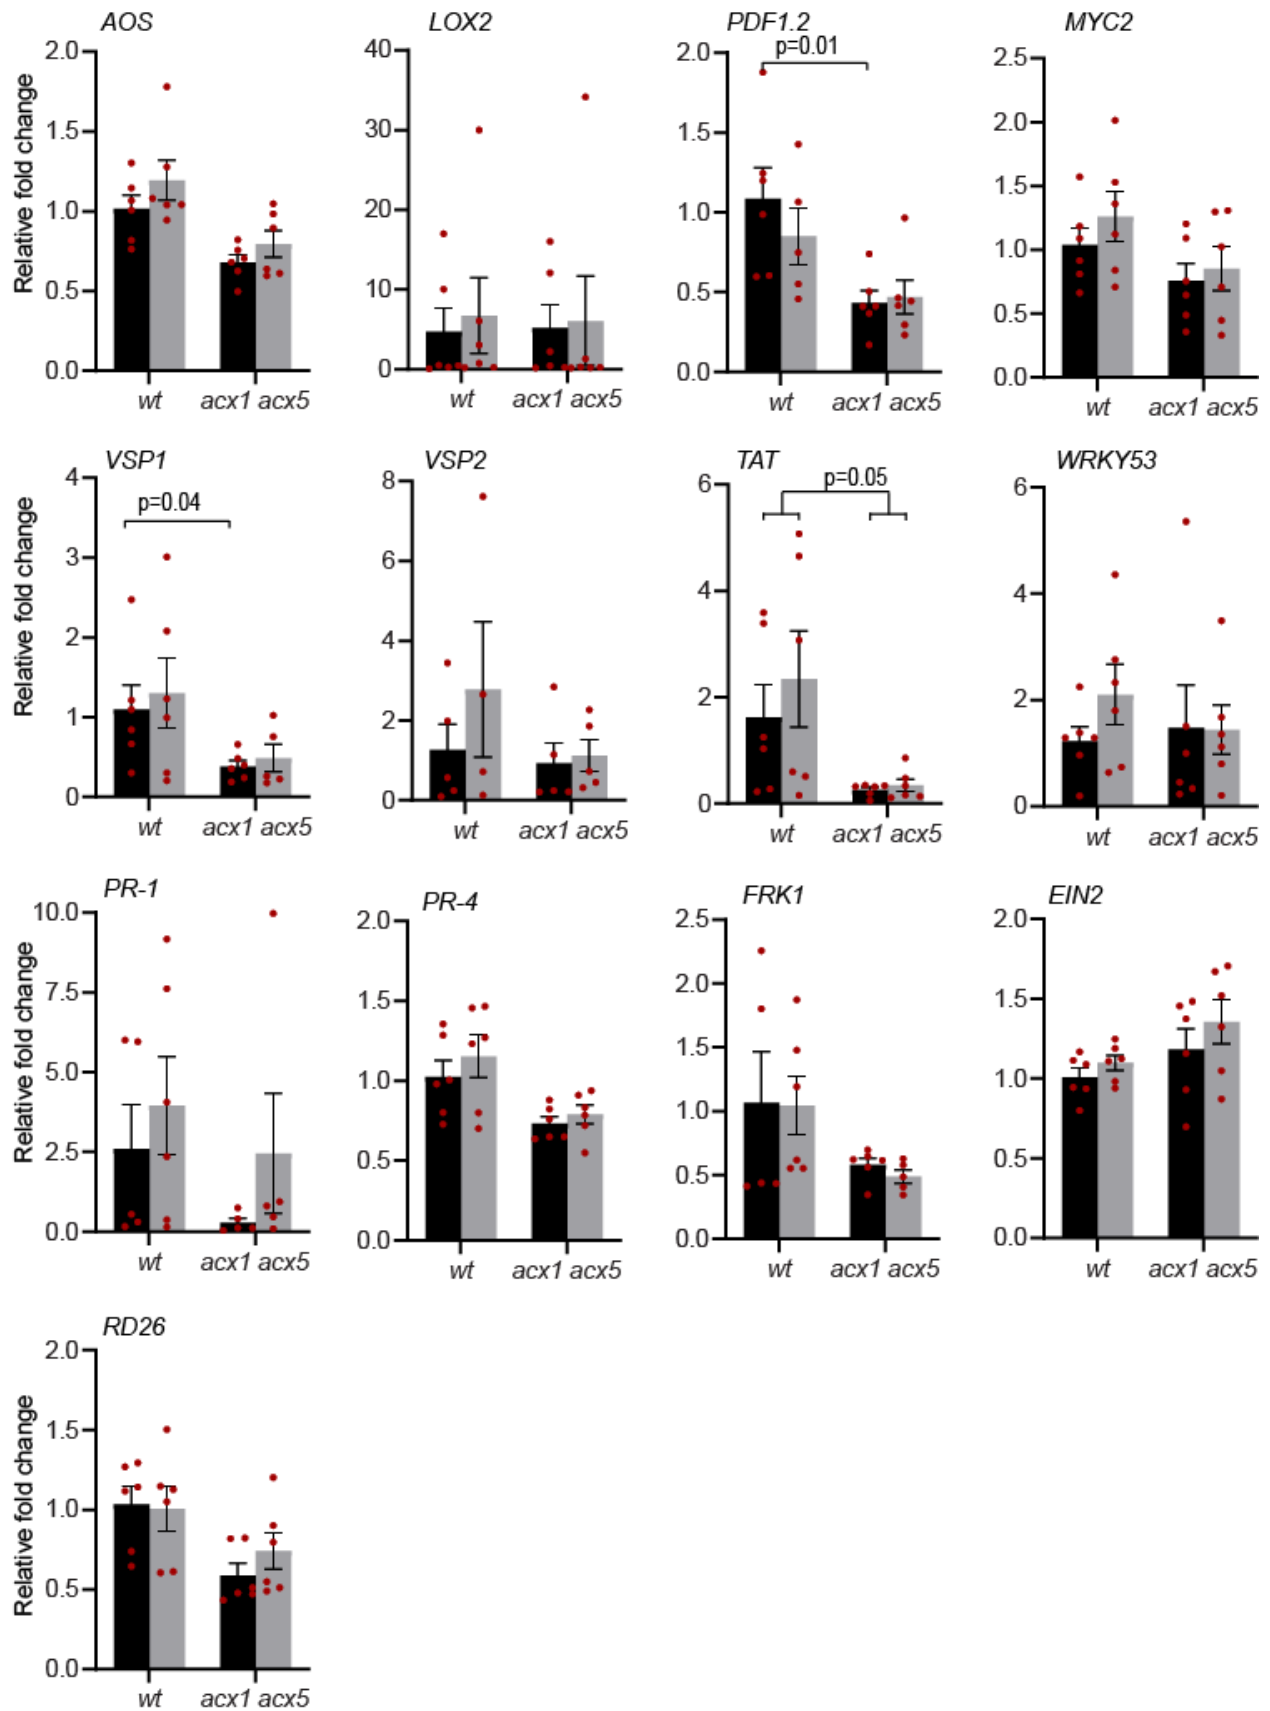



56 **Supplementary Figure 8 | At a concentration of 50 nM, ascr#18 does not activate defense**  
57 **responses in *Arabidopsis* roots.** Expression of defense-related genes in *Arabidopsis* roots 48 h  
58 after treatment with 50 nM ascr#18. Transcript level of jasmonic acid signaling genes ( *PDF1.2*,  
59 *AOS*, *LOX2*, *MYC2* (*Jasmonate insensitive 1*), *Vegetative storage protein 1, 2* (*VSP1*, *VSP2*), and  
60 *Tyrosine Aminotransferase* (*TAT*)), salicylic acid signaling genes (*PR-1* and *PR-4*), MAPK  
61 signaling related *FRK1*, transcription factor *WRKY53* (involved in both JA and SA signaling),  
62 ethylene signaling gene *Ethylene sensitive 2* (*EIN2*) and abscisic acid signaling gene *Responsive*  
63 *to Dessication 26* (*RD26*) were determined by qRT-PCR. Data are mean±SEM (n ≥ 4). two-  
64 tailed *t*-test. Source data are provided as a source data file.

65

66

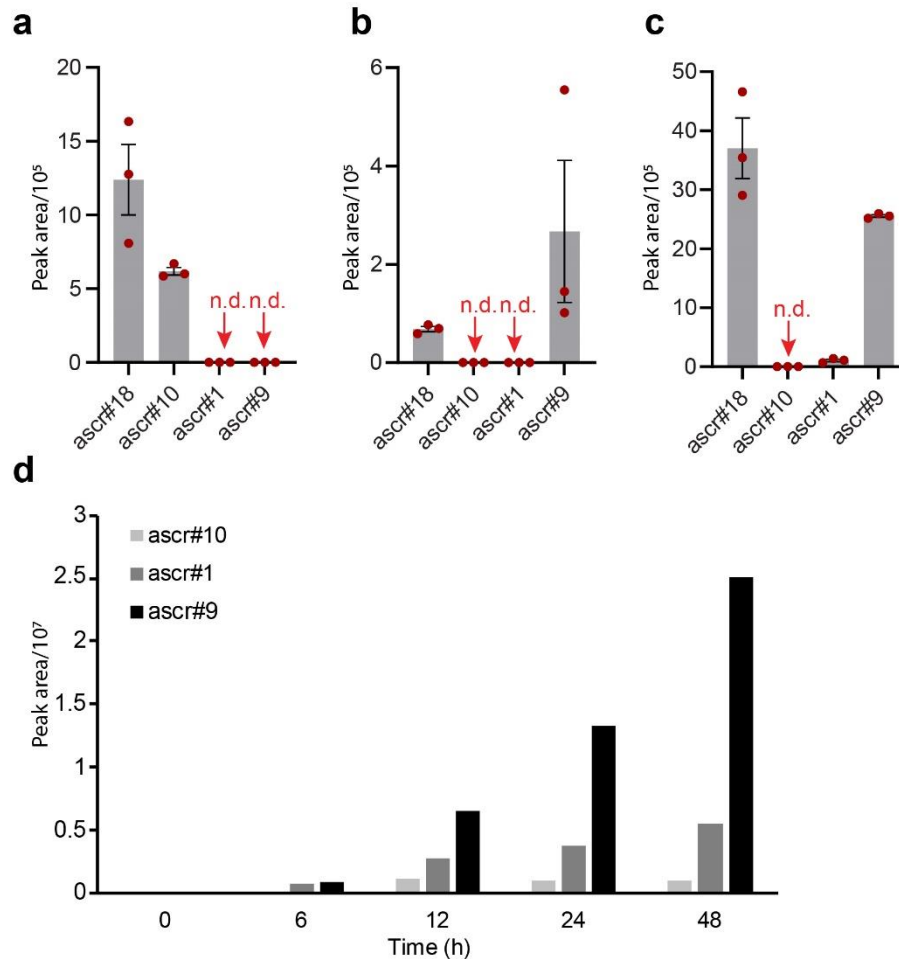

67

68 **Supplementary Figure 9 | The abundance of ascarosides in root exudates.** (a) Relative  
69 abundances of ascarosides in root exudates of ten-day old *Arabidopsis acx1 acx5* mutant  
70 seedlings treated with 10 nM ascr#18 for 6 h. Exudates from approximately 40 seedlings were  
71 collected in distilled water for 1 h and pooled in one tube. Abundances of ascarosides are shown  
72 as the peak area, as measured in LC-MS. Data are average  $\pm$  SEM (n = 3), n.d. = not detected.  
73 (b-c) Relative abundances of ascarosides in root exudates of eight-day old tomato seedlings  
74 treated with 10 nM (b) or 1000 nM (c) ascr#18 for 6 h. Exudates from approximately 10  
75 seedlings were collected in distilled water for 1 h and pooled in one tube. Abundances of  
76 ascarosides are shown as the peak area, as measured in LC-MS. Data are average  $\pm$  SEM (n = 3),  
77 n.d. = not detected. (d) Relative abundances of ascr#10, ascr#1, and ascr#9 in the growth media  
78 of eight-day old tomato seedlings supplemented with 1  $\mu$ M ascr#18. Ten-gram media was  
79 collected over a 48 h period for metabolome extraction. Abundances of ascarosides are shown as  
80 the peak area, as measured in LC-MS. Source data are provided as a source data file.

81 **Supplementary Table 1: Primers used in this study.**

| <b>Primer Name</b> | <b>Sequence</b>             |
|--------------------|-----------------------------|
| AtPR-1 F           | TCGTCTTTGTAGCTCTTGTAGGTG    |
| AtPR-1 R           | TAGATTCTCGTAATCTCAGCTCT     |
| AtPDF1.2-F         | TCATGGCTAAGTTTGCTTCC        |
| AtPDF1.2-R         | AATACACACGATTAGCACC         |
| AtFRK1-fw          | TGCAGCGCAAGGACTAGAG         |
| AtFRK1-rv          | ATCTTCGCTTGGAGCTTCTC        |
| AtPHI-fw           | TTGGTTTACGACGGGATGGTG       |
| AtPHI-rv           | ACTCCAGTACAAGCCGATCC        |
| AtUBQ10-fw         | GGCCTTGTATAATCCCTGATGAATAAG |
| AtUBQ10-rv         | AAAGAGATAACAGGAACGGAAACATAG |
| AtPR4-F            | CTGGACCGCCTTCTGCGGG         |
| AtPR4-R            | AGCCTCCGTTGCTGCATTGGT       |
| AtAOS-F            | TCTTCTCTTCGCCACGTGC         |
| AtAOS-R            | GGTTATGAACTTGATGACCCGC      |
| AtLOX2-F           | TTGCTCGCCAGACACTTGC         |
| AtLOX2-R           | GGGATCACCATAAACGGCC         |
| AtVSP1-F           | ACTGGTCGTGGTTAGAGTCC        |
| AtVSP1-R           | CTCCAATATTCCCAACGATG        |
| AtVSP2-F           | TCCATCAACTACGCCAACT         |
| AtVSP2-R           | GGAGGGTATCATCTAGTACAA       |
| AtMYC2-F           | CTGGCAACCGTCGTATGATTTCT     |
| AtMYC2-R           | AACCATTCCGTATCCGTCACCTC     |
| AtTAT-F            | TGGCTCTAGGGGCAGAGAAT        |
| AtTAT-R            | CCTTGGAGATGGCATGACGA        |
| AtWRKY53-F         | TCACTTTTTCTGACCACTTTGG      |
| AtWRKY53-R         | AAGGAAGAGATATGTTAAGTTGGG    |
| AtEIN2-F           | GGTGTGCGTCTTATGGTCTG        |
| AtEIN2-R           | AACTGCTCAAAGGGCTGTCTGG      |
| AtRD26-F           | TTATTGGAAAGCAACGGGTA        |
| AtRD26-R           | TCGTCAAGCTGTGATGAAGA        |
| AtERF1-F           | CTAATCGAGCAGTCCACGCAACA     |
| AtERF1-R           | GTCCCGAGCCAAACCCTAATACC     |
| AtMPK3-F           | ATGCGCTTATTGACAGAGTT        |
| AtMPK3-R           | TCAGAGCTTGTTCAACAGTG        |

82

83

84
